# Supplementary material for: Importance of a nano-sized molybdenum composite synthesized using a microwave oven in the sorption enhancement of Au(iii) from the aqueous phase
Source: Royal Society of Chemistry journal article supplement (doi:10.1039/d3en00651d), 2023-12-13
Supplement: d3en00651d1.pdf [file d3en00651d1.pdf]

1 **Importance of nano-sized molybdenum composite simply synthesized by a microwave oven in**  
2 **sorption enhancement of Au(III) from the aqueous phase**

3 Chuanhao Yan<sup>a</sup>, Xuefeng Yu<sup>a</sup>, Jinlong Zhang<sup>a</sup>, Jinglei He<sup>a</sup>, Wenyi Jia<sup>a</sup>, Jianlong Wang<sup>b</sup>, Fuqiang Liu<sup>c</sup>,  
4 Junfeng Liu<sup>a</sup>, Xilong Wang<sup>a,\*</sup>

5 <sup>a</sup> Laboratory for Earth Surface Processes, College of Urban and Environmental Sciences, Peking  
6 University, Beijing 100871, China

7 <sup>b</sup> College of Food Science and Engineering, Northwest A & F University, Yangling 712100, China

8 <sup>c</sup> State Key Laboratory of Pollution Control and Resource Reuse, School of the Environment, Nanjing  
9 University, Nanjing 210023, China

10

11 Corresponding author. Email address: xilong@pku.edu.cn (X. Wang)

12

13 **Supplementary information**

14

15 **Details for calculating the composition of each component in MoCOM**

16 Base on the XPS spectra of MoCOM (Fig. 3 a-e), We first identified the main components of MoCOM  
17 was MoS<sub>2</sub>, MoO<sub>3</sub>, and activated carbon (AC). Considering the relative atomic mass (*A<sub>r</sub>*) of Mo, S, and  
18 O, we can list the mathematical equations below:

19 
$$W(Mo) = W(MoS_2) \times \frac{A_r(Mo)}{A_r(Mo) + 2 \times A_r(S)} + W(MoO_3) \times \frac{A_r(Mo)}{A_r(Mo) + 3 \times A_r(O)} \quad (S1)$$

20 
$$W(S) = W(MoS_2) \times \frac{2 \times A_r(S)}{A_r(Mo) + 2 \times A_r(S)} \quad \#(S2)$$

21 
$$W(O + H) = W(MoO_3) \times \frac{A_r(Mo)}{A_r(Mo) + 3 \times A_r(O)} + W(O + H \text{ in } AC) \quad \#(S3)$$

22 
$$W(AC) = W(MoO_3) + W(O + H \text{ in } AC) + W(C) + W(N) \quad \#(S4)$$

23 where *W* (w/w, %) represents the mass fraction of a specific component or element as indicated in the  
24 parenthese in MoCOM. There are four unknown terms (*W*(MoS<sub>2</sub>), *W*(MoO<sub>3</sub>), *W*(AC), and *W*(O + H in  
25 AC)) and four equations. By solving the above equations, we can calculate the composition of MoS<sub>2</sub>,

26 MoO<sub>3</sub>, and activated carbon in MoCOM, as shown in Fig. 3 f.

27

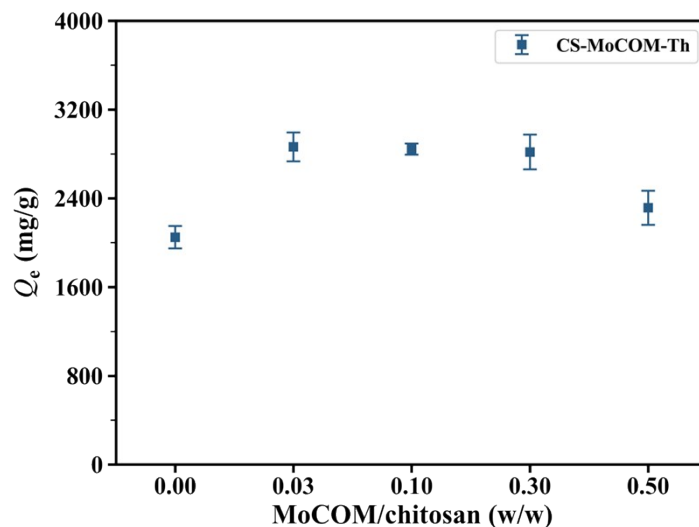

28

29 **Fig. S1.** The relationship between the mass ratio of MoCOM to chitosan and  $Q_e$ .

30

31

32 **Table S1.** Langmuir, Freundlich, and Temkin model fitting results for sorption isotherms of Au(III) by

33 CS-Th and CS-MoCOM-Th.

| Sorption isotherm models | Parameters                            | Nanofiber mats |             |
|--------------------------|---------------------------------------|----------------|-------------|
|                          |                                       | CS-Th          | CS-MoCOM-Th |
| Langmuir model           | $K_L$ (mL/mg)                         | 17.5           | 21.5        |
|                          | $Q_m$ (mg/g)                          | 2960           | 4090        |
|                          | $R^2$                                 | 0.979          | 0.987       |
| Freundlich model         | $n$                                   | 2.63           | 2.55        |
|                          | $K_F$ ((mg/g)/(mg/L) <sup>1/n</sup> ) | 3320           | 4760        |
|                          | $R^2$                                 | 0.895          | 0.923       |
| Temkin model             | $K_T$ (10 <sup>5</sup> mL/mg)         | 0.776          | 1.11        |
|                          | $B_T$                                 | 218            | 295         |
|                          | $R^2$                                 | 0.919          | 0.920       |

34

35

36

37

38

39 **Table S2.** Pseudo-first-order, pseudo-second-order, and Elovich model fitting results for sorption  
 40 kinetics of Au(III) by CS-Th and CS-MoCOM-Th.

| Sorption kinetics models  | Parameters                    | Nanofiber mats |             |
|---------------------------|-------------------------------|----------------|-------------|
|                           |                               | CS-Th          | CS-MoCOM-Th |
| Pseudo-first-order model  | $k_1$ ( $10^{-3}$ mg/(min·g)) | 3.54           | 5.58        |
|                           | $Q_e$ (mg/g)                  | 1330           | 1340        |
|                           | $R^2$                         | 0.935          | 0.682       |
| Pseudo-second-order model | $k_2$ ( $10^{-6}$ g/(min·mg)) | 6.16           | 7.57        |
|                           | $Q_e$ (mg/g)                  | 2150           | 2920        |
|                           | $R^2$                         | 0.996          | 0.998       |
| Elovich model             | $\alpha$ (mg/min·g)           | 149            | 501         |
|                           | $\beta$ ( $10^{-3}$ g/mg)     | 3.10           | 2.51        |
|                           | $R^2$                         | 0.950          | 0.956       |

41

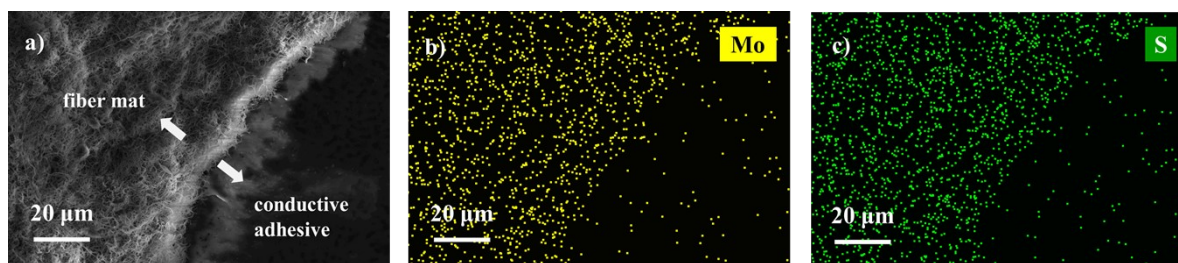

42

43 **Fig. S2.** SEM image (a) and EDS mapping (b and c) for CS-MoCOM-Th.

44

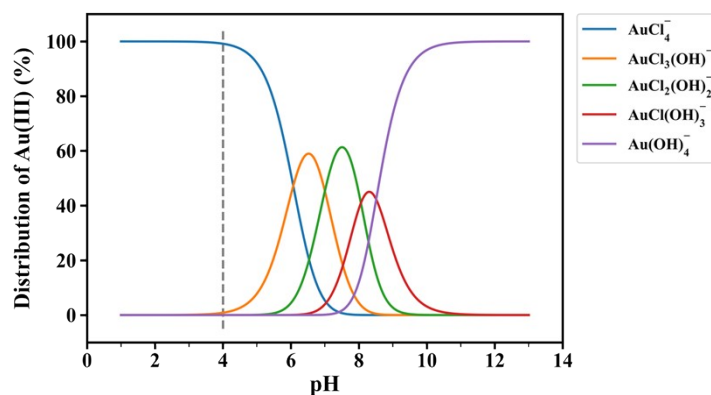

45

46 **Fig. S3.** The speciation distribution of Au(III) at different pH values.

47
